# Supplementary material for: Rotisserie-like motion enables guest transport in a nonporous organic crystal involving a diboron host
Source: Royal Society of Chemistry journal article supplement (doi:10.1039/d5cc05394c), 2026-01-01
Supplement: d5cc05394c1.pdf [file d5cc05394c1.pdf]

## ***Supporting Information***

# Rotisserie-like Motion Enables Guest Transport in a Nonporous Organic Crystal Involving a Diboron Host

*Gonzalo Campillo-Alvarado,<sup>a,\*</sup> Eva C. Vargas-Olvera,<sup>b</sup> Dale C. Swenson,<sup>c</sup> Hugo Morales-Rojas,<sup>b</sup> Herbert Höpfel<sup>b</sup> and Leonard R. MacGillivray<sup>c,d,\*</sup>*

*<sup>a</sup>Department of Chemistry, Reed College, Portland, OR 97202-8199, United States.*

*<sup>b</sup>Centro de Investigaciones Químicas, Instituto de Investigación en Ciencias Básicas y Aplicadas, Universidad Autónoma del Estado de Morelos, Av. Universidad 1001, Cuernavaca, 62209, México*

*<sup>c</sup>Department of Chemistry, University of Iowa, Iowa City, Iowa 52242, United States*

*<sup>d</sup>Département de Chimie, Université de Sherbrooke, Sherbrooke, QC, J1K 2R1 Canada*

*E-mail: [leonard.macgillivray@usherbrooke.ca](mailto:leonard.macgillivray@usherbrooke.ca)  
[gcampillo@reed.edu](mailto:gcampillo@reed.edu)*

## S1. Supplemental Experimental Procedures

### Materials:

2,4-difluorophenylboronic acid, catechol, 4,4'-azopyridine (**4,4'-apy**) and benzene were obtained from Sigma Aldrich and used without further purification. Difluorophenylboronic acid catechol ester (**1**) was synthesized following a reported literature procedure.<sup>1</sup>

Synthesis of **S**: **1** (0.050 g, 0.216 mmol) and **4,4'-apy** (0.020 g, 0.108 mmol) were dissolved in 2.5 mL of benzene). The solution was gently heated in a sealed vial until the starting materials were completely dissolved. Crystals of **S** in the form of dark-red prisms formed upon slow evaporation of the solution at room temperature after 3 days. The crystallization vial contained traces (1:10) of single crystals of **I** in the form of red prisms.

Synthesis of **D**: Single crystals of **S** transform into **D** spontaneously under ambient temperature and pressure after ca. 1.5 hours after being removed from the mother liquor in the crystallization vial.

### Instruments and methods:

Single-crystal X-ray diffraction data for **S** and **D** were collected on a Nonius Kappa CCD single-crystal X-ray diffractometer using MoK $\alpha$  radiation ( $\lambda=0.71073$  Å). Data for **I** were collected on a Bruker Nonius APEX II Kappa single-crystal X-ray diffractometer using MoK $\alpha$  radiation ( $\lambda=0.71073$  Å) graphite monochromator equipped with an Oxford Cryostream low temperature device. Crystals were mounted in Paratone oil on a Mitegen magnetic mount. Lorentz and polarization corrections were applied and programs from the APEXII package were used for data reduction. Structure solution and refinement were accomplished using SHELXL<sup>2</sup> and SHELXT,<sup>3</sup> respectively within the Olex2<sup>4</sup> graphical user interface. Non-hydrogen atoms were refined anisotropically and hydrogen atoms were placed in geometrically calculated positions using a riding model. Crystal structures were generated using Mercury, Olex2 and Diamond software packages. Metrics were calculated using Olex2 from the .res files using shelxl matrices.

Thermogravimetric and differential scanning calorimetry (TG-DSC) analyses were performed on a TA SDT Q600 instrument with approximately 3.5 mg of a crystalline solid sample at a heating rate of 10°C/min within the temperature range of 30–600°C using a current of nitrogen as inert gas purge (50 mL/min). Scans were analyzed with Universal V4.2E TA Instruments software package. <sup>1</sup>H NMR spectra were recorded on a Bruker Ascend Evo 400 MHz spectrometer with chloroform-d as internal standard.

Theoretical studies based on density functional theory (DFT) were used to explore the molecular geometry and energy of the systems. All calculations were carried out using the Gaussian16 program using the 6-311++G(d,p) basis set.<sup>5</sup> Molecular coordinates were obtained from the SCXRD data. Geometry optimizations of single crystal structures were performed by fixing non-hydrogen atom coordinates, and only hydrogen atoms were optimized. Fully geometry optimized structures of **S** and **I** without benzene were calculated for comparison.

## S2. Single-crystal X-ray Diffraction Data

**Table S1.** Crystallographic parameters for **S**, **D** and **I**.

| Compound name                                  | <b>S</b>                                                      | <b>D</b>                                                      | <b>I</b>                                                      |
|------------------------------------------------|---------------------------------------------------------------|---------------------------------------------------------------|---------------------------------------------------------------|
| Empirical formula                              | $C_{34}H_{22}B_2F_4N_2O_4 \cdot 2C_6H_6$                      | $C_{34}H_{22}B_2F_4N_2O_4$                                    | $C_{34}H_{22}B_2F_4N_2O_4 \cdot C_6H_6$                       |
| Formula weight                                 | 804.42                                                        | 648.19                                                        | 726.30                                                        |
| Temperature/K                                  | 298.15                                                        | 298.15                                                        | 190.15                                                        |
| Crystal system                                 | monoclinic                                                    | monoclinic                                                    | monoclinic                                                    |
| Space group                                    | $P2_1/c$                                                      | $P2_1/n$                                                      | $P2_1/c$                                                      |
| $a/\text{\AA}$                                 | 7.5341(8)                                                     | 7.3611(12)                                                    | 12.6124(13)                                                   |
| $b/\text{\AA}$                                 | 14.4259(14)                                                   | 13.623(2)                                                     | 15.3927(15)                                                   |
| $c/\text{\AA}$                                 | 16.8748(17)                                                   | 15.855(3)                                                     | 17.4936(17)                                                   |
| $\alpha/^\circ$                                | 90                                                            | 90                                                            | 90                                                            |
| $\beta/^\circ$                                 | 92.484(5)                                                     | 102.723(11)                                                   | 105.945(5)                                                    |
| $\gamma/^\circ$                                | 90                                                            | 90                                                            | 90                                                            |
| Volume/ $\text{\AA}^3$                         | 1832.3(3)                                                     | 1550.9(5)                                                     | 3265.5(6)                                                     |
| Z                                              | 2                                                             | 2                                                             | 4                                                             |
| $\rho_{\text{calc}}/\text{g/cm}^3$             | 1.316                                                         | 1.388                                                         | 1.398                                                         |
| $\mu/\text{mm}^{-1}$                           | 0.099                                                         | 0.107                                                         | 0.106                                                         |
| F(000)                                         | 748.0                                                         | 664.0                                                         | 1412.0                                                        |
| Crystal size/ $\text{mm}^3$                    | $0.34 \times 0.16 \times 0.12$                                | $0.34 \times 0.16 \times 0.12$                                | $0.19 \times 0.13 \times 0.08$                                |
| Radiation                                      | MoK $\alpha$ ( $\lambda = 0.71073$ )                          | MoK $\alpha$ ( $\lambda = 0.71073$ )                          | MoK $\alpha$ ( $\lambda = 0.71073$ )                          |
| 2 $\theta$ range for data collection/ $^\circ$ | 5.648 to 47.998                                               | 5.268 to 48.996                                               | 5.35 to 52.82                                                 |
| Index ranges                                   | $-7 \leq h \leq 8, -16 \leq k \leq 16, -19 \leq l \leq 19$    | $-8 \leq h \leq 7, -13 \leq k \leq 15, -18 \leq l \leq 18$    | $-15 \leq h \leq 15, -18 \leq k \leq 18, -21 \leq l \leq 21$  |
| Reflections collected                          | 8676                                                          | 8293                                                          | 35911                                                         |
| Independent reflections                        | 2823 [ $R_{\text{int}} = 0.1190, R_{\text{sigma}} = 0.1185$ ] | 2587 [ $R_{\text{int}} = 0.1074, R_{\text{sigma}} = 0.1087$ ] | 6620 [ $R_{\text{int}} = 0.0594, R_{\text{sigma}} = 0.0606$ ] |
| Data/restraints/parameters                     | 2823/36/260                                                   | 2587/0/209                                                    | 6620/511/475                                                  |
| Goodness-of-fit on $F^2$                       | 0.954                                                         | 0.999                                                         | 1.030                                                         |
| Final R indexes [ $I \geq 2\sigma(I)$ ]        | $R_1 = 0.0660, wR_2 = 0.1601$                                 | $R_1 = 0.0809, wR_2 = 0.1551$                                 | $R_1 = 0.0719, wR_2 = 0.1799$                                 |
| Final R indexes [all data]                     | $R_1 = 0.1749, wR_2 = 0.2100$                                 | $R_1 = 0.2115, wR_2 = 0.1857$                                 | $R_1 = 0.1303, wR_2 = 0.2171$                                 |
| Largest diff. peak/hole / $e\text{\AA}^{-3}$   | 0.43/-0.22                                                    | 0.18/-0.19                                                    | 0.56/-0.43                                                    |
| CCDC deposition number                         | 1998621                                                       | 1998622                                                       | 1998623                                                       |

**Table S2.** Hydrogen bond and  $\pi\cdots\pi$  contact parameters for **S**, **D** and **I**.

| Crystal  | D–H...A/<br>Centroid...Centroid | <i>d</i> (D–H)<br>[Å] | <i>d</i> (H...A)<br>[Å] | <i>d</i> (D...A)<br>[Å] | $\angle$ (D–H...A)<br>[deg] | Symmetry code         |
|----------|---------------------------------|-----------------------|-------------------------|-------------------------|-----------------------------|-----------------------|
| <b>S</b> | C17–H17...F2                    | 0.930                 | 2.486                   | 3.398                   | 166.7                       | -x,-1/2+y,1/2-z       |
|          | C13–H13...F1                    | 0.930                 | 2.504                   | 3.272                   | 140.2                       | -                     |
|          | Cg1...Cg2 <sup>1</sup>          | -                     | -                       | 3.898                   | -                           | -                     |
| <b>D</b> | C13–H13...F2                    | 0.930                 | 2.465                   | 3.346                   | 158.2                       | -x+1/2, y+1/2, -z+3/2 |
|          | Cg1...Cg2 <sup>2</sup>          | -                     | -                       | 3.771                   | -                           | -x+3/2, y-1/2, -z+3/2 |
| <b>I</b> | C25–H25...F3                    | 0.950                 | 2.544                   | 3.328                   | 134.0                       | -x, y+1/2, -z+3/2     |
|          | Cg1...Cg2 <sup>3</sup>          | -                     | -                       | 3.676                   | -                           | -x+1,y-1/2,-z+3/2     |
|          | Cg3...Cg4 <sup>3</sup>          | -                     | -                       | 3.877                   | -                           | -x+1,y-1/2,-z+3/2     |
|          | Cg5...Cg6 <sup>3</sup>          | -                     | -                       | 3.737                   | -                           | -x,y+1/2,-z+3/2       |

<sup>1</sup>Cg1 = N1, C13–C17; Cg2 = C18–C23. <sup>2</sup>Cg1 = C1–C6; Cg2 = N1, C13–C17. <sup>3</sup>Cg1 = C1–C6; Cg2 = N1, C13–C17; Cg3 = C7–C12; Cg4 = N4, C18–C22; Cg5 = C23–C28; Cg6 = N1, C13–C17.

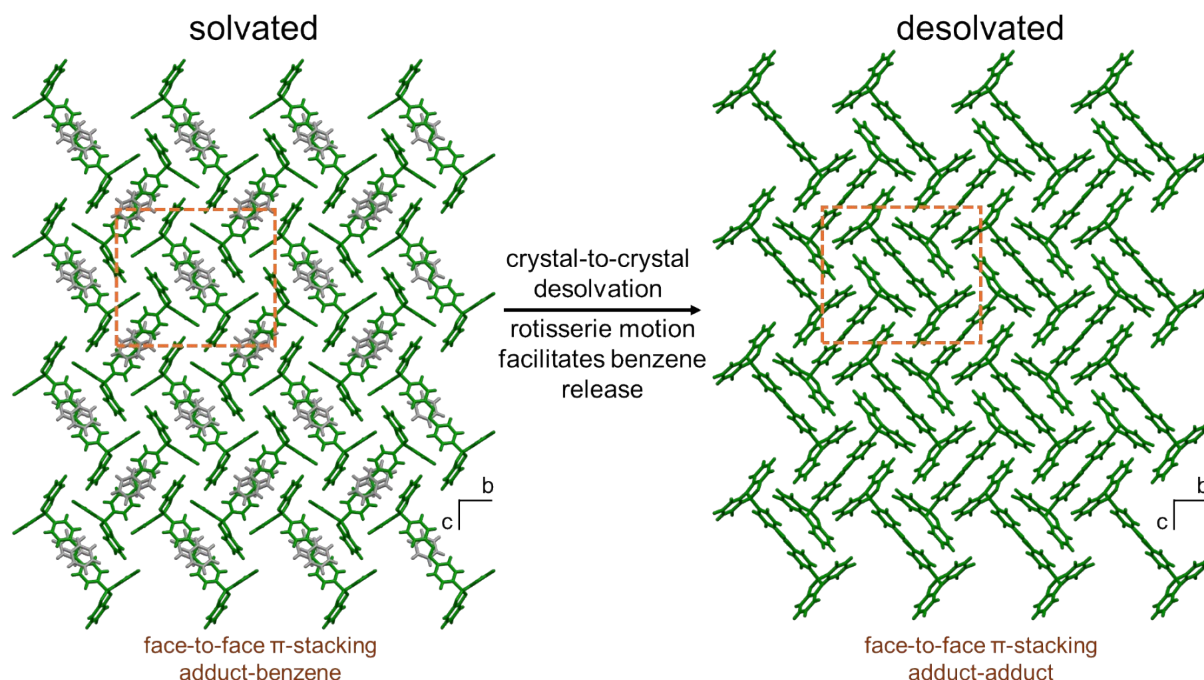

**Figure S1.** Crystal structures of **S** (left) and **D** (right) depicting the observed cooperative rotisserie-like motion that facilitates crystal-to-crystal desolvation. In the **S** crystal, adduct-benzene is primarily supported by face-to-face  $\pi$ -stacking whereas rotisserie-like rotation of azopyridine in **D** generates face-to-face  $\pi$ -stacking between adjacent adducts.

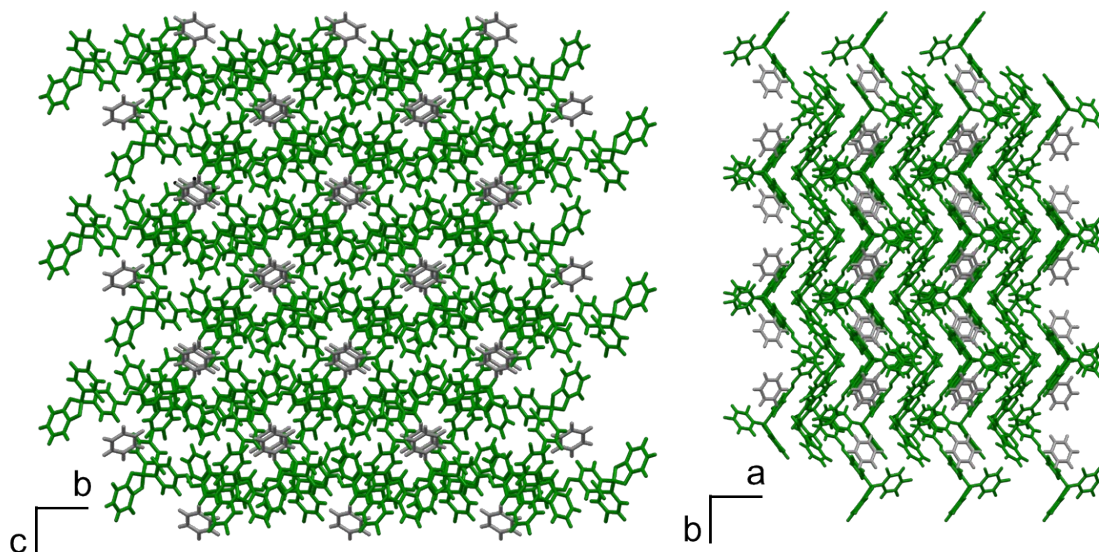

**Figure S2.** Crystal structure view of **I**, showing the inclusion of benzene molecules via edge-to-face  $\pi$ -stacking. The packing of adducts shows close face-to-face  $\pi$ -stacking, directing the benzene molecule to the generated side cavities of the assembly.

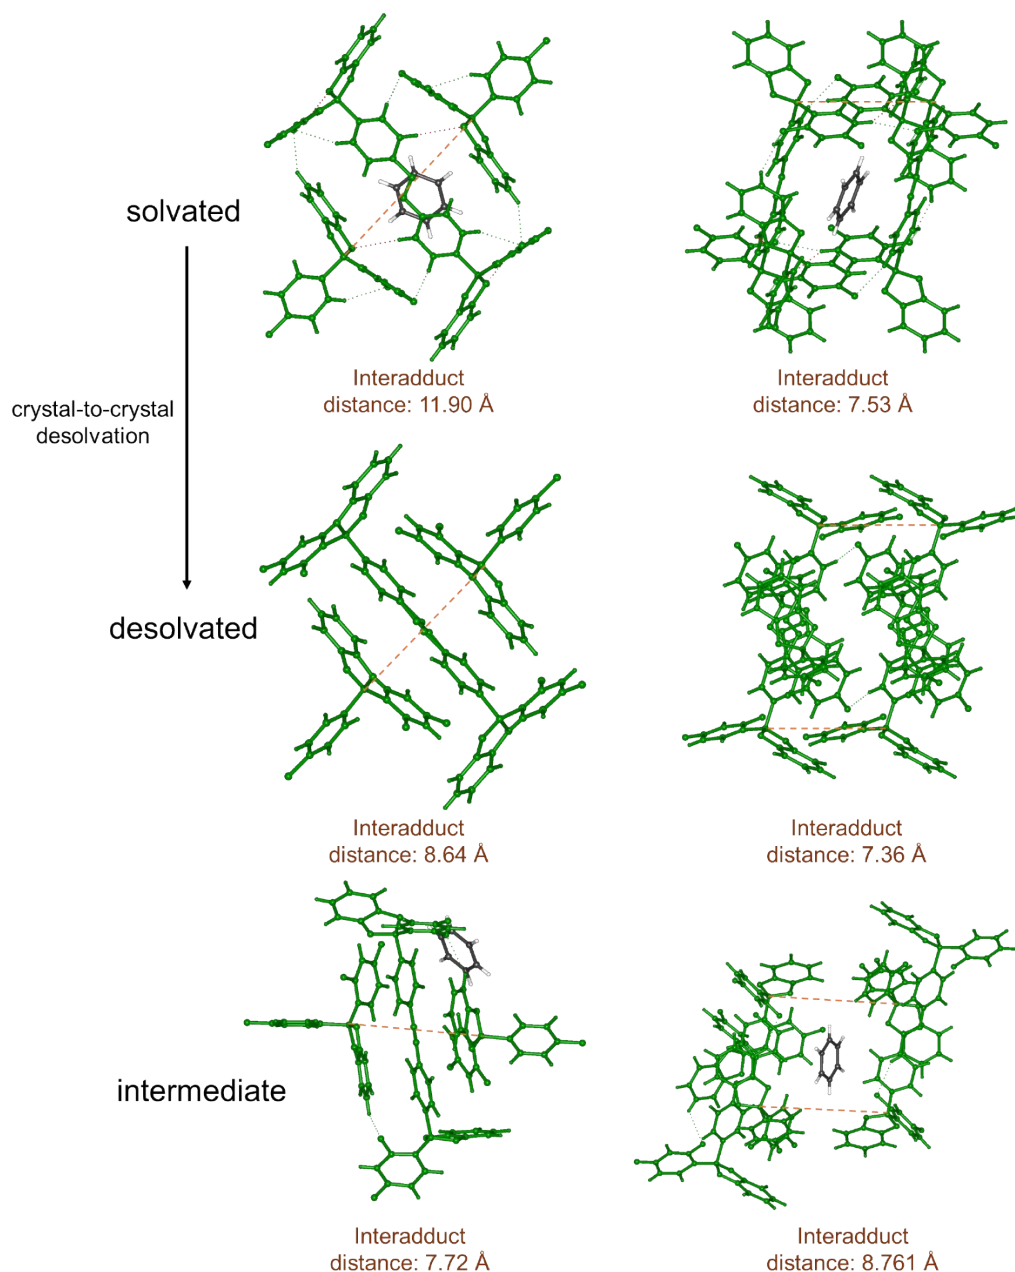

**Figure S3.** Crystal structures of solvated, **S** (top), desolvated, **D** (middle), and intermediate, **I** (bottom). The structures of **S** and **D** show the changes in interadduct distances upon desolvation in two different views. Upon a rotisserie-style conformational change and desolvation, the adducts approach one another, maximizing face-to-face  $\pi$ -stacking. The crystal structure of **I** shows the presence of face-to-face  $\pi$ -stacking and the placement of benzene on the side of the assembly by face-to-face  $\pi$ -stacking.

### S3. Thermal data

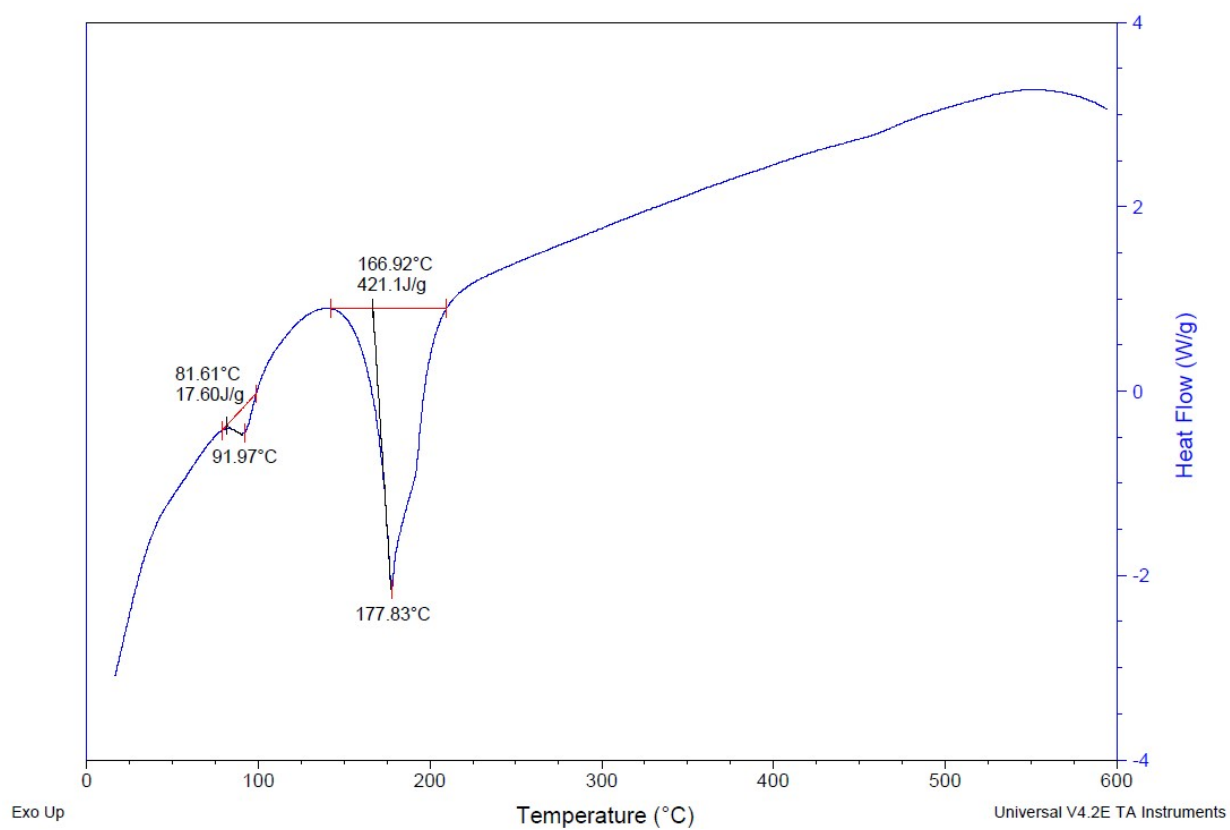

**Figure S4.** Differential scanning calorimetry analysis of **S**.

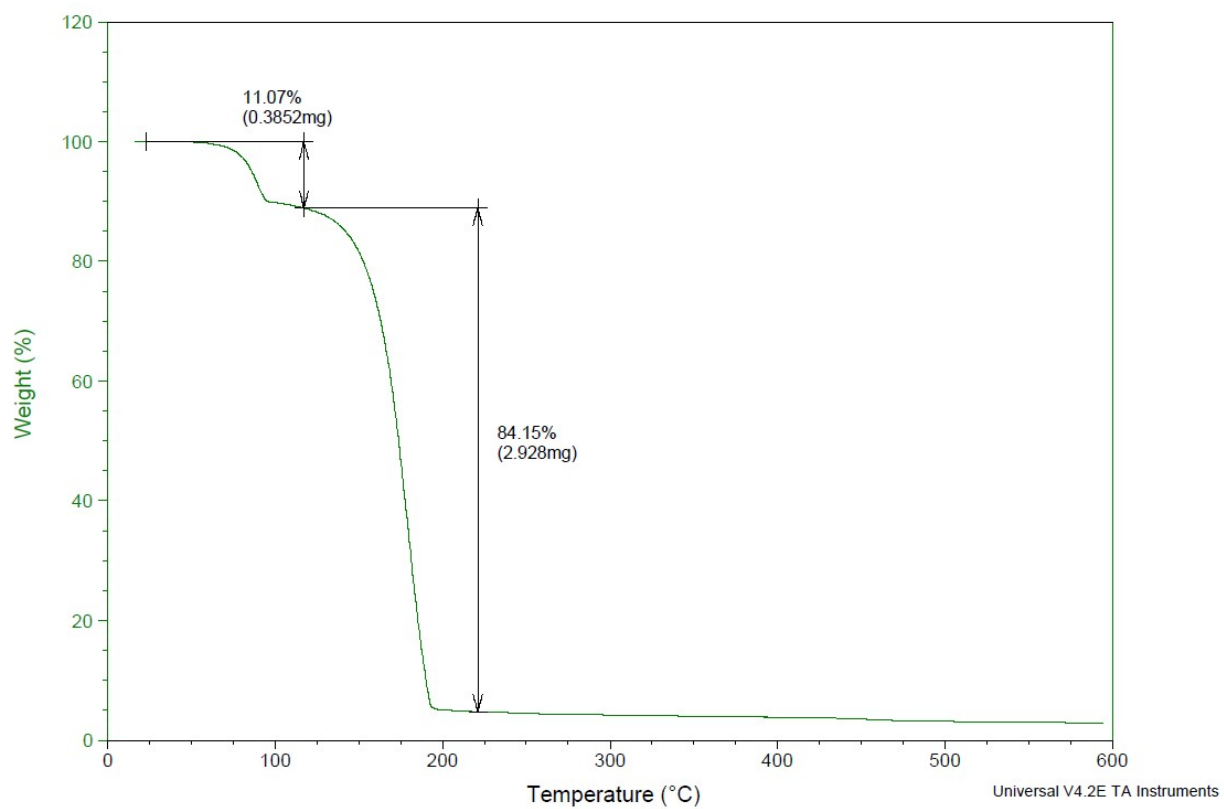

**Figure S5.** Thermogravimetric analysis of **S**.



#### S4. Molecular modeling data

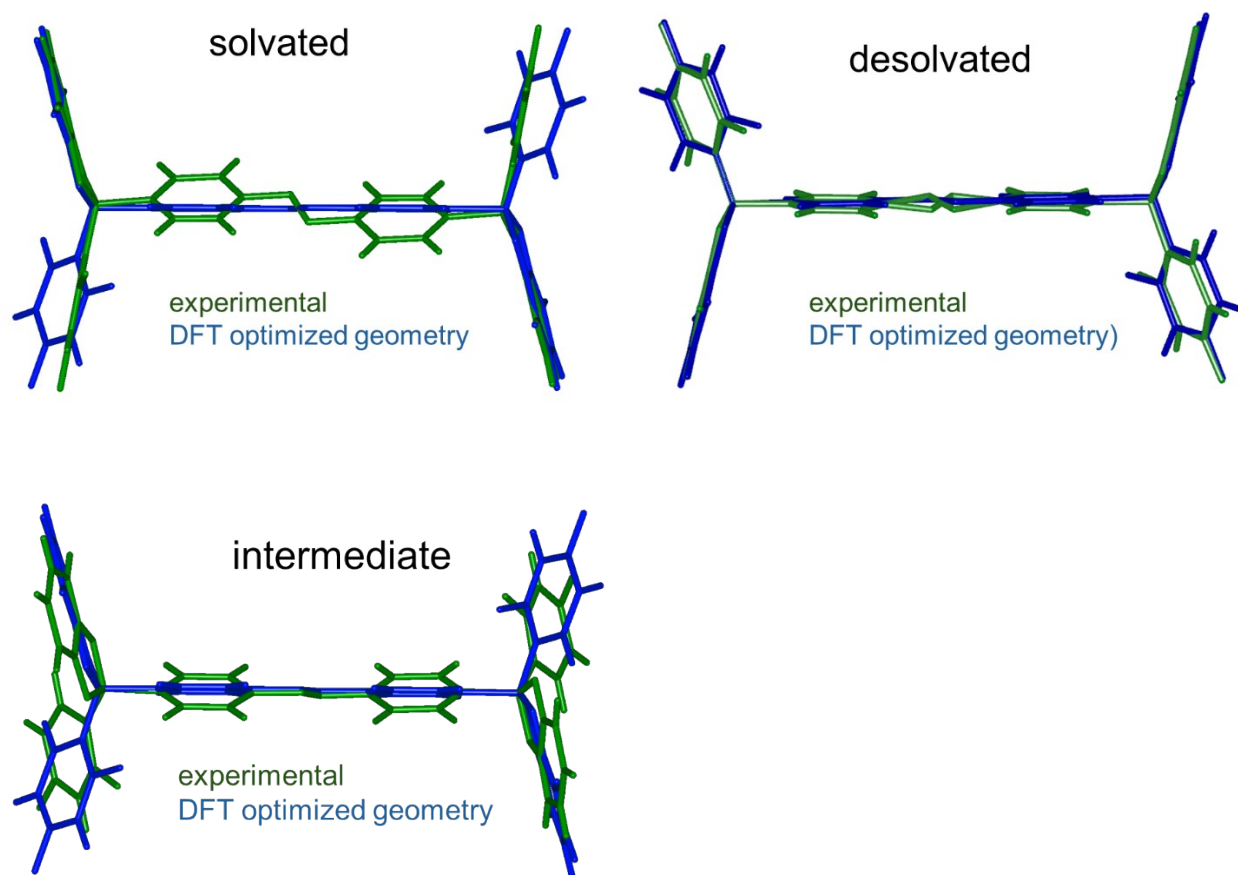

**Figure S6.** Overlays of molecular conformations of crystal structures of solvated (**S**), desolvated (**D**), and intermediate (**I**) structures (green), and their resulting conformations after geometry optimization (blue).

#### S4. Molecular modeling data

**Table S3.** Calculated electronic energies ( $E_{\text{SFC}}$ , Hartree) and relative energies ( $\Delta E$ , kcal/mol) for diboron adducts **S** and **I** before and after geometry optimization.

| System                        | $E_{\text{SFC}}$ (Hartree) | $\Delta E$ (kcal/mol) |
|-------------------------------|----------------------------|-----------------------|
| <b>S</b>                      | -2278.579703               | 0 (reference)         |
| <b>S</b> , geometry optimized | -2278.611382               | -19.878877            |
| <b>I</b>                      | -2278.599827               | 0 (reference)         |
| <b>I</b> , geometry optimized | -2278.611596               | -7.385161             |

**S5.  $^1\text{H}$  nuclear magnetic resonance data**

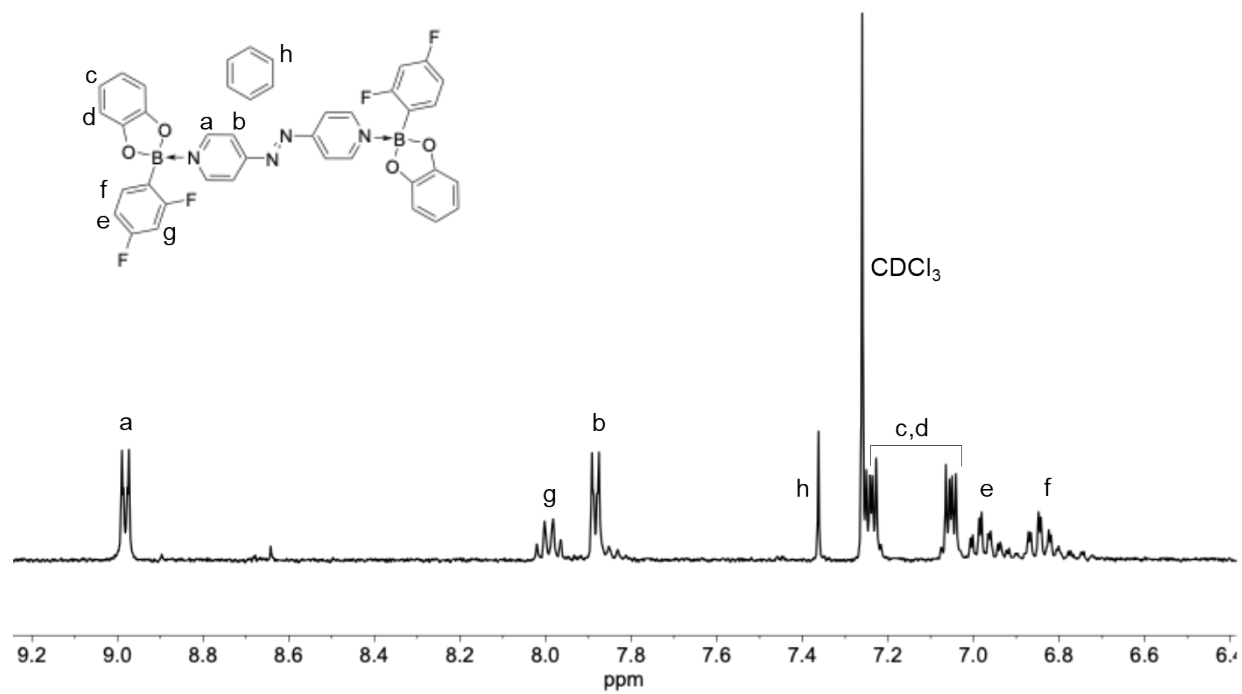

**Figure S7.**  $^1\text{H}$  NMR spectrum of **S**.

#### **S4. Supplemental References**

1. G. Campillo-Alvarado, E. C. Vargas-Olvera, H. Höpfl, A. D. Herrera-España, O. Sánchez-Guadarrama, H. Morales-Rojas, L. R. MacGillivray, B. Rodríguez-Molina and N. Farfán, *Cryst. Growth Des.*, 2018, **18**, 2726-2743.
2. G. M. Sheldrick, *Acta Cryst. C*, 2015, **71**, 3-8.
3. G. M. Sheldrick, *Acta Cryst. A*, 2015, **71**, 3-8.
4. O. V. Dolomanov, L. J. Bourhis, R. J. Gildea, J. A. Howard and H. Puschmann, *J. Appl. Crystallogr.*, 2009, **42**, 339-341.
5. Z. Zebbiche, G. Şekerci, B. Housseem, F. Küçükbay, S. Tekin, H. Küçükbay and B. Boumoud, *J. Biochem. Mol. Toxicol.*, 2025, **39**, e70346.
